# Supplementary material for: Improving the moisture stability of perovskite solar cells by using PMMA/P3HT based hole-transport layers
Source: Royal Society of Chemistry journal article supplement (doi:10.1039/c7qm00396j), 2017-10-31
Supplement: c7qm00396j1.pdf [file c7qm00396j1.pdf]

## Electronic Supplementary Information

---

### **Improving the Moisture Stability of Perovskite Solar Cells by Using PMMA/P3HT Based Hole-transport Layers**

Soumya Kundu and Timothy L. Kelly\*

Department of Chemistry, University of Saskatchewan, 110 Science Place, Saskatoon, SK S7N 5C9, Canada.

## Experimental section

### Materials

ITO-coated glass ( $R_s = 20 \text{ } \Omega \cdot \text{sq}^{-1}$ ) substrates were purchased from Delta Technologies. Poly(3-hexylthiophene) (P3HT, electronic grade,  $M_w \sim 50 \text{ kDa}$ ) and zinc acetate dihydrate were purchased from Rieke Metals Inc., and Alfa Aesar, respectively. Ag (99.99%) and Au pellets (99.99%) were purchased from Kurt J. Lesker. PMMA ( $M_w \sim 350 \text{ kDa}$ ), lead(II) iodide (99%), methylamine (37% in absolute ethanol), hydriodic acid (57% in  $\text{H}_2\text{O}$ ), 4-*tert*-butylpyridine (96%) and lithium bis(trifluoromethanesulfonyl)imide (Li-TFSI, 99%) were purchased from Sigma-Aldrich. All solvents were purchased from Fisher Scientific. All chemicals were used without any further purification.

### Characterization

A Cary 6000i spectrophotometer was used to record UV-vis spectra. Powder X-ray diffraction measurements were carried out on a PANalytical Empyrean diffractometer configured using a cobalt X-ray source ( $\text{Co K}_\alpha$ ,  $\lambda = 1.79 \text{ \AA}$ ). The data were collected with a  $0.0469^\circ$  step size ( $2\theta$ ). Scanning electron microscopy was carried out on a Hitachi SU8010 microscope operating at a 1.0–5.0 kV landing voltage. AFM measurements were performed using a Dimensions Hybrid Nanoscope system (Veeco Metrology Group) under tapping mode in air.

### Synthesis of ZnO nanoparticles

ZnO nanoparticles were synthesized by previously reported procedures.<sup>1,2</sup> Zinc acetate dihydrate (2.95 g, 13.4 mmol) was first dissolved in methanol (125 mL) at  $70^\circ\text{C}$  followed by the addition of a solution of KOH (1.48 g, 23 mmol) in methanol (65 mL) over a period of 10-15 minutes. The reaction mixture was allowed to stir continuously at  $65^\circ\text{C}$  for an additional 2.5 h. The reaction mixture was allowed to cool down to room temperature and the precipitate was washed twice with methanol ( $2 \times 50 \text{ mL}$ ). Finally, chloroform (10 mL), n-butanol (50 mL) and methanol (5 mL) were added to prepare a translucent dispersion of ZnO nanoparticles ( $\sim 6 \text{ mg/mL}$ ). The solution was filtered using a  $0.45 \text{ } \mu\text{m}$  PVDF syringe filter prior to use.

### Synthesis of methylammonium iodide

Methylammonium iodide was synthesized according to literature procedures.<sup>3, 4</sup> First, a solution of methylamine (30 mL, 37% in EtOH) was added to 200 mL of ethanol and cooled to  $0^\circ\text{C}$ , followed by the dropwise addition of hydriodic acid (30 mL). The reaction mixture was allowed to stir continually at  $0^\circ\text{C}$  for 2 h. The product was recovered by removing the solvent on a rotary evaporator at  $50^\circ\text{C}$  for 1 h. It was washed with diethyl ether ( $3 \times 50 \text{ mL}$ ), dissolved in ethanol (50 mL), and reprecipitated in diethyl ether to obtain crystalline methylammonium iodide. The powder was dried under high vacuum for 1 day at  $65^\circ\text{C}$ .

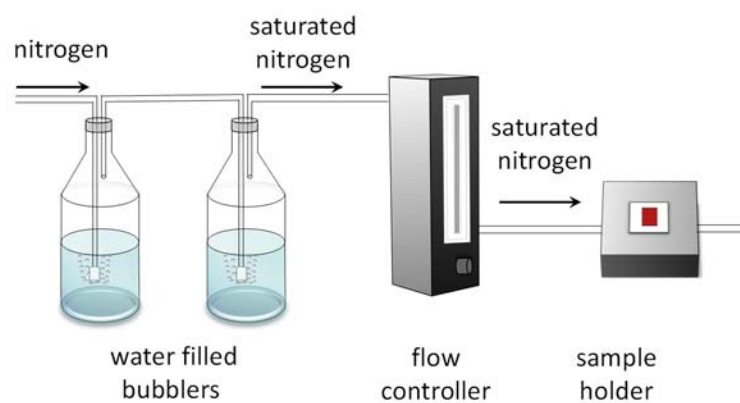

**Fig. S1.** Schematic illustration of the RH control setup for in situ UV/vis spectroscopy.

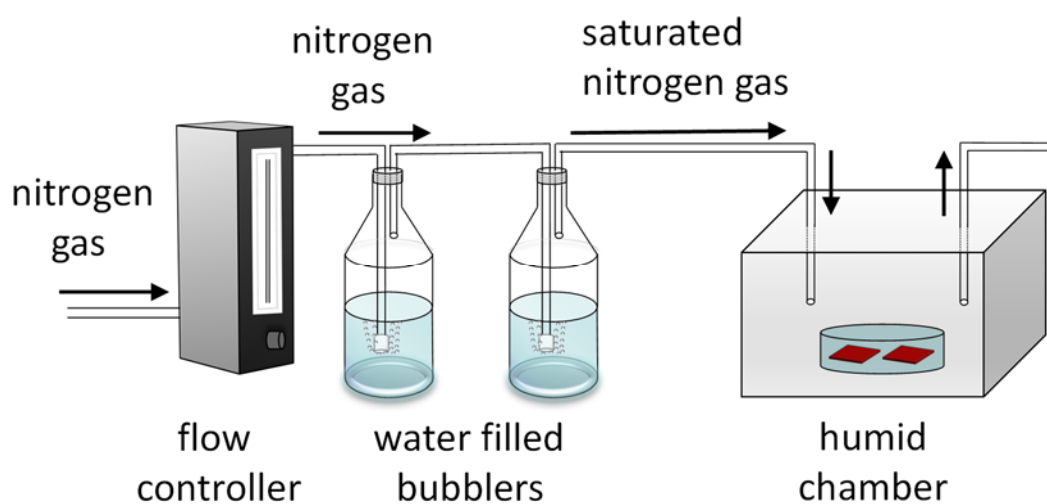

**Fig. S2.** Schematic illustration of the RH control setup for measuring device lifetime.

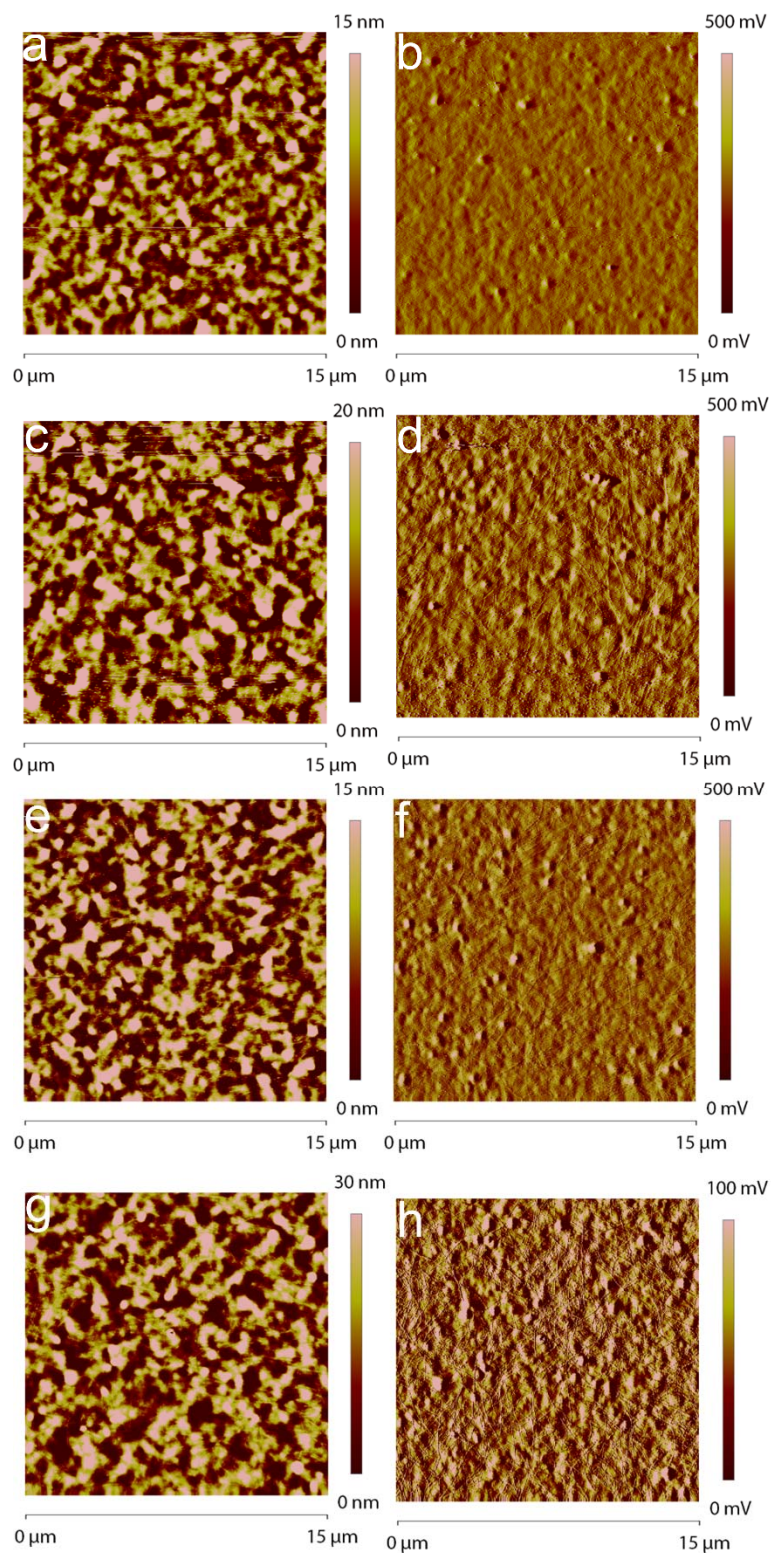

**Fig. S3.** AFM images of PMMA/P3HT thin films on  $\text{SiO}_2/\text{ZnO}/\text{CH}_3\text{NH}_3\text{PbI}_3/\text{P3HT}$  substrates with different PMMA/P3HT ratios: (a) 95:5, height image; (b) 95:5, phase image; (c) 90:10, height image; (d) 90:10, phase image; (e) 85:15, height image; (f) 85:15, phase image; (g) 80:20, height image; (h) 80:20, phase image.

**Table S1.** Average device performance parameters for ITO/ZnO/CH<sub>3</sub>NH<sub>3</sub>PbI<sub>3</sub>/HTLs/Ag devices. The associated uncertainties represent plus-or-minus one standard deviation from the mean.

| HTLs            | # of devices | $V_{oc}$ (V)    | $J_{sc}$ (mA/cm <sup>2</sup> ) | Fill Factor (%) | PCE (%)       | Best Efficiency (%) |
|-----------------|--------------|-----------------|--------------------------------|-----------------|---------------|---------------------|
| PMMA/P3HT 80:20 | 60           | $0.89 \pm 0.06$ | $16 \pm 1$                     | $48 \pm 5$      | $6.8 \pm 0.7$ | 8.4                 |
| PMMA/P3HT 85:15 | 60           | $0.92 \pm 0.04$ | $16 \pm 1$                     | $49 \pm 5$      | $7.5 \pm 0.9$ | 9.3                 |
| PMMA/P3HT 90:10 | 60           | $0.92 \pm 0.06$ | $16 \pm 1$                     | $53 \pm 6$      | $8.1 \pm 0.9$ | 10.6                |
| PMMA/P3HT 95:5  | 40           | $0.89 \pm 0.04$ | $11 \pm 2$                     | $41 \pm 5$      | $4.2 \pm 0.6$ | 5.4                 |
| P3HT            | 30           | $0.97 \pm 0.03$ | $15.8 \pm 0.8$                 | $62 \pm 5$      | $9.1 \pm 0.9$ | 11.0                |

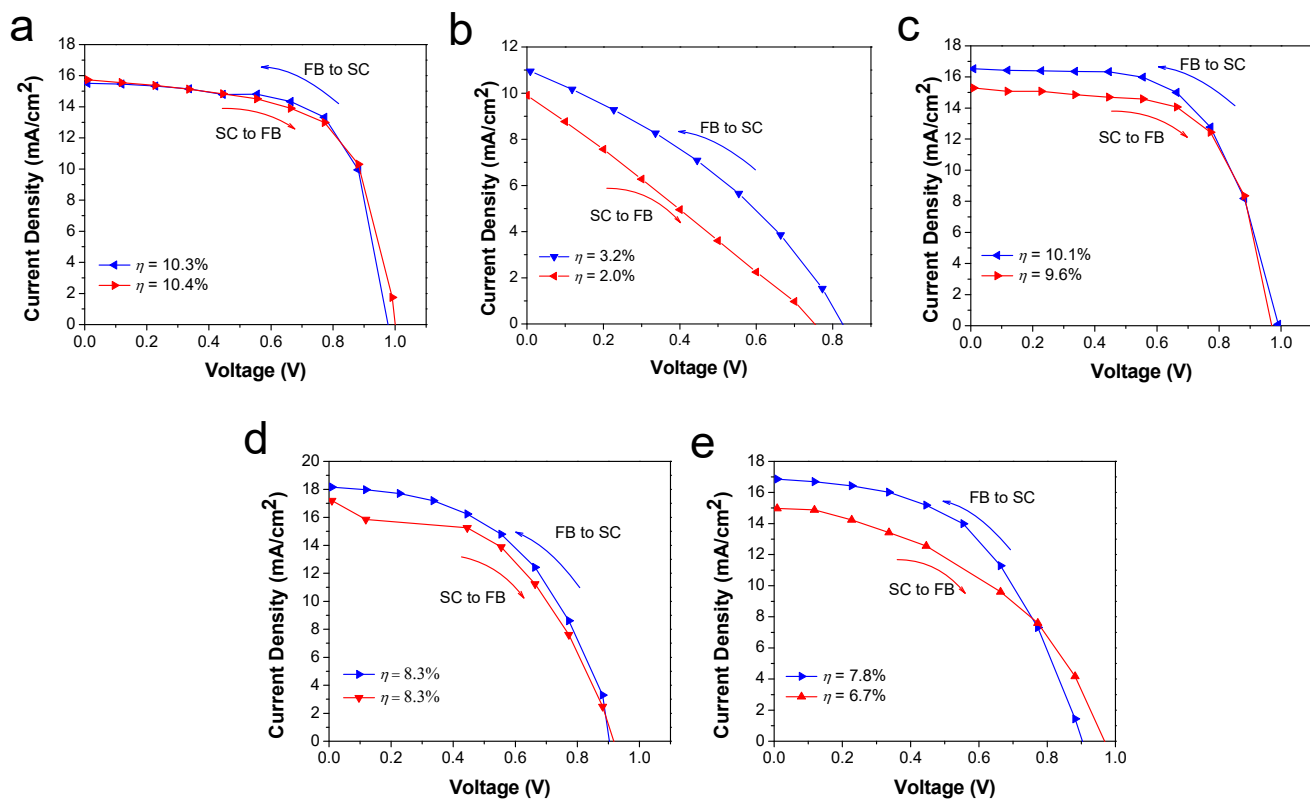

**Fig. S4.**  $J$ - $V$  curves in both scan directions for devices with various HTLs: (a) P3HT; (b) 95:5 (c) 90:10, (d) 85:15, (e) 80:20 PMMA/P3HT.  $J$ - $V$  curves were measured at a scan rate of  $0.1 \text{ V} \cdot \text{s}^{-1}$ .

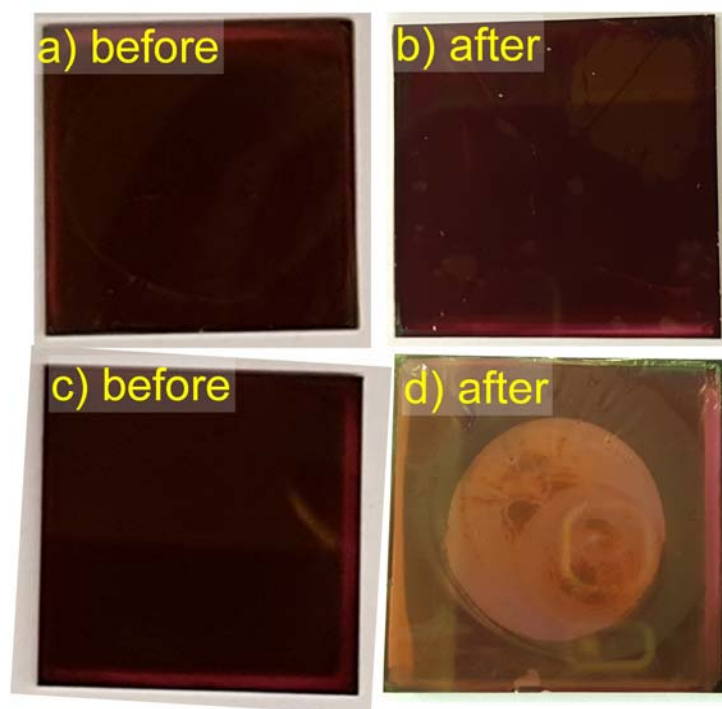

**Fig. S5.** Photographs of polymer-coated perovskite films exposed to liquid water for 1 minute: (a) 90:10 PMMA/P3HT-coated, before; (b) 90:10 PMMA/P3HT-coated, after; (c) P3HT-coated, before; (d) P3HT-coated, after.

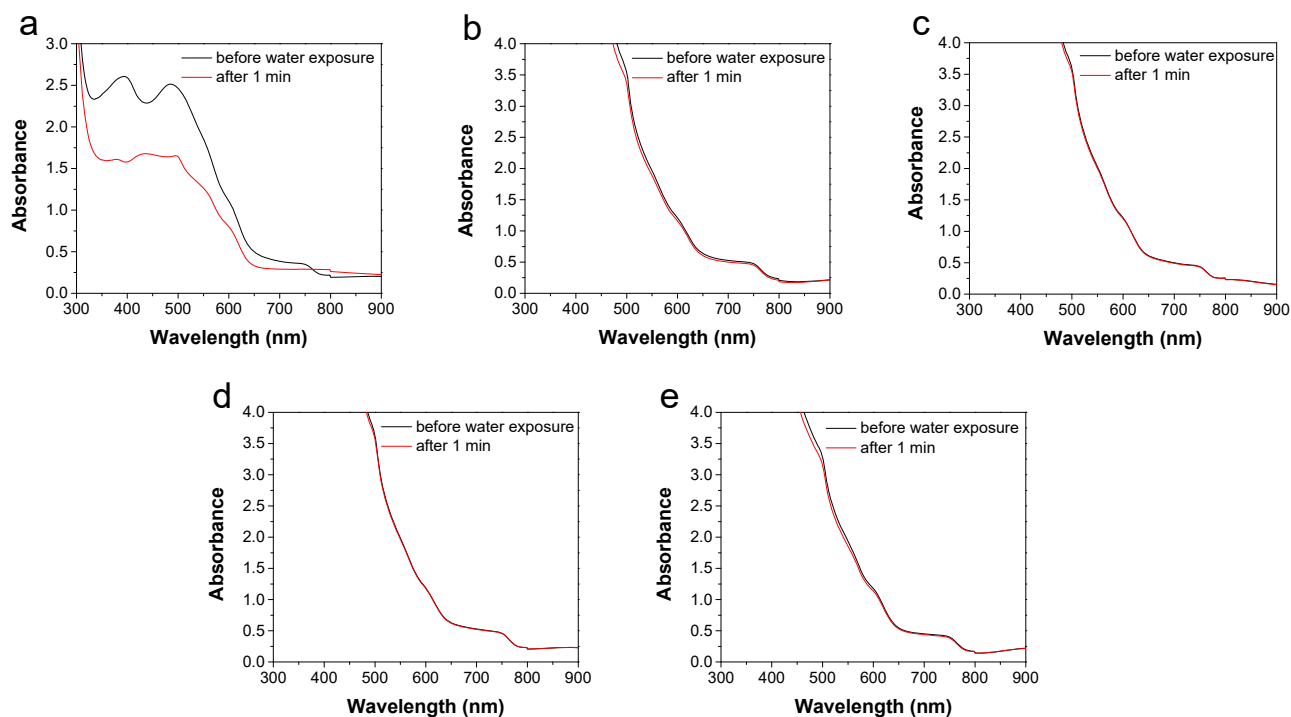

**Fig. S6.** Absorption spectra of polymer-coated perovskite films, before and after exposure to liquid water for 1 minute: (a) P3HT; (b) 95:5, (c) 90:10, (d) 85:15, and (e) 80:20 PMMA/P3HT.

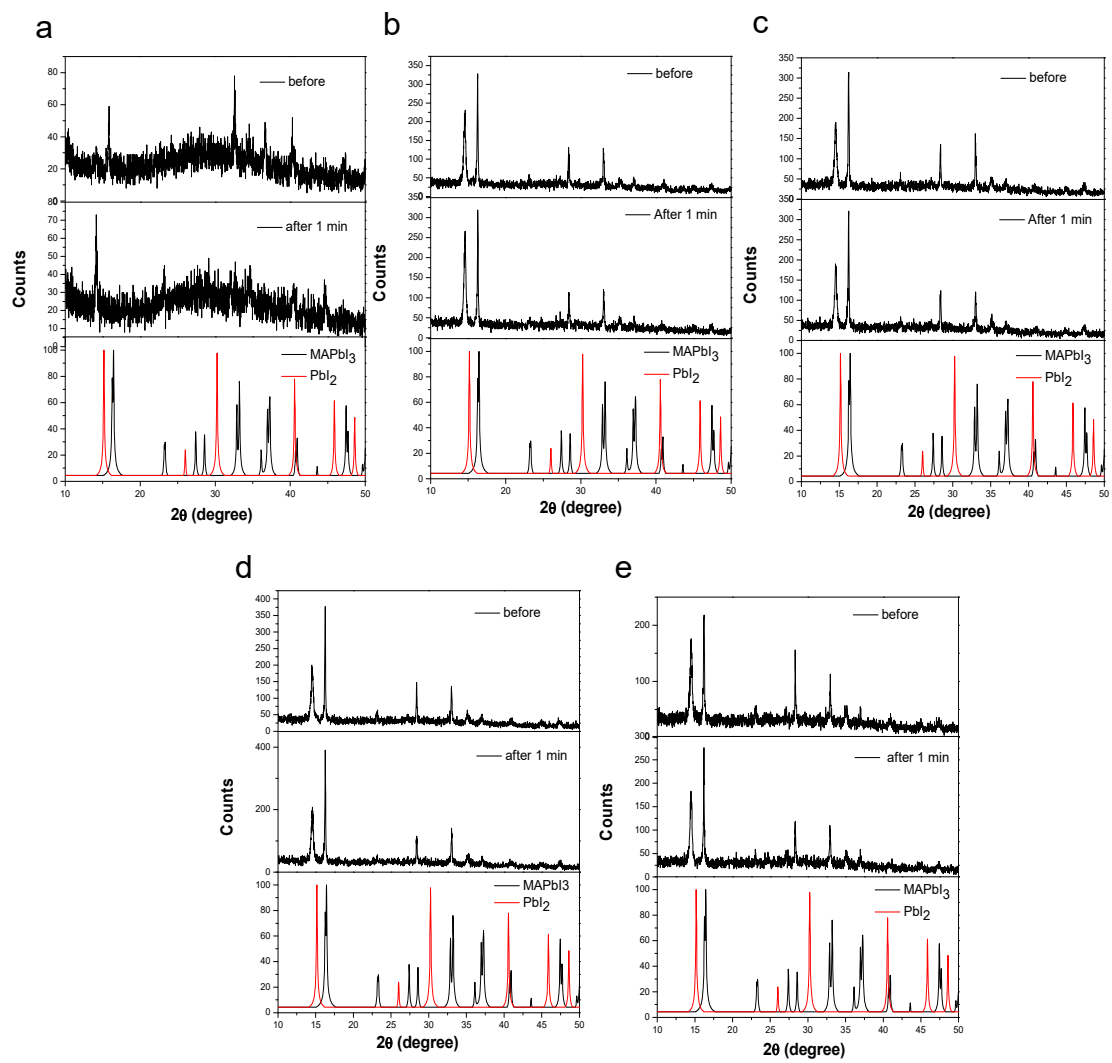

**Fig. S7.** pXRD patterns of polymer-coated perovskite films, before and after exposure to liquid water for 1 minute: (a) P3HT; (b) 95:5, (c) 90:10, (d) 85:15, and (e) 80:20 PMMA/P3HT.



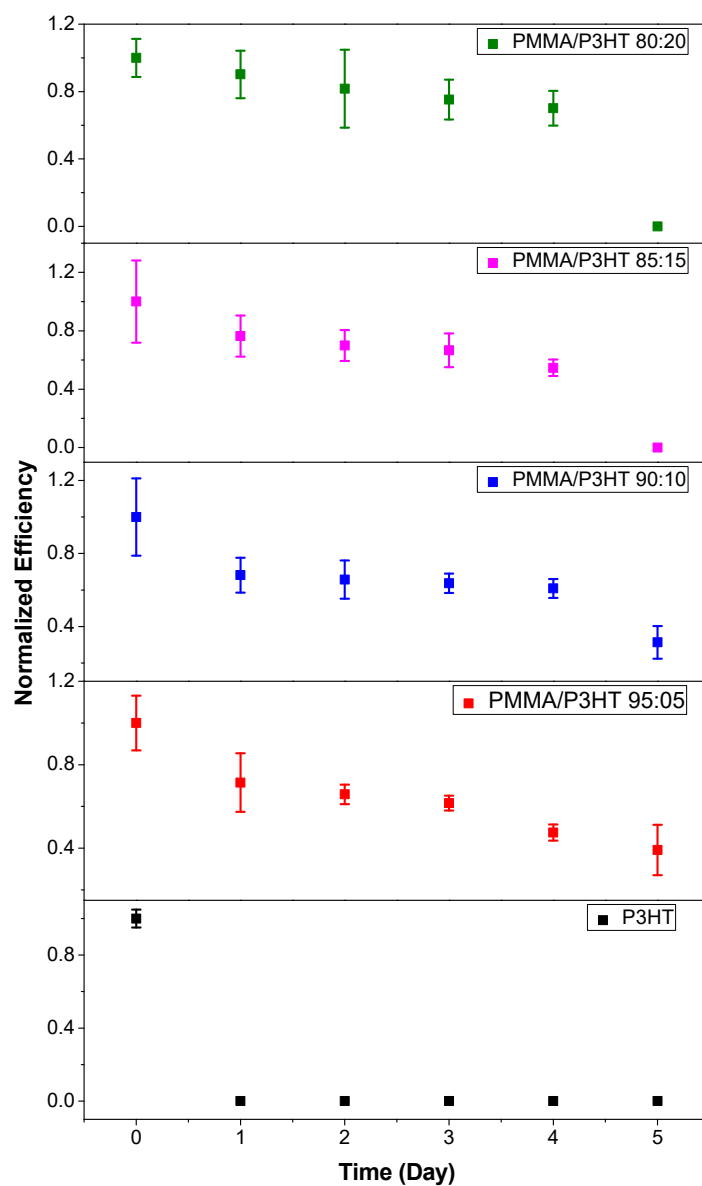

**Fig. S8.** Normalized power conversion efficiency as a function of time for perovskite solar cells with silver electrodes, stored in a 35-45% RH environment. Error bars denote plus-or-minus one standard deviation from the mean.

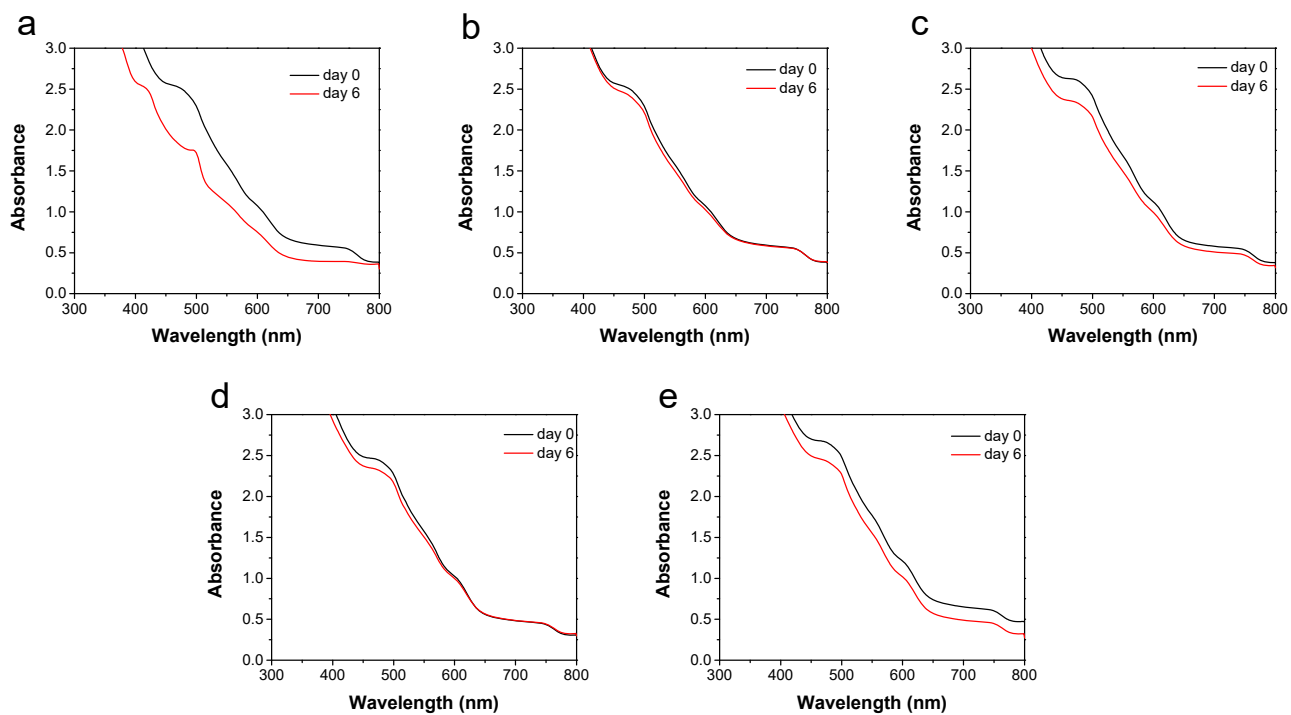

**Fig. S9.** Absorption spectra of perovskite solar cells with various HTLs before and after aging in air (RH = 35 – 45%): (a) P3HT; (b) 95:5, (c) 90:10, (d) 85:15, and (e) 80:20 PMMA/P3HT.

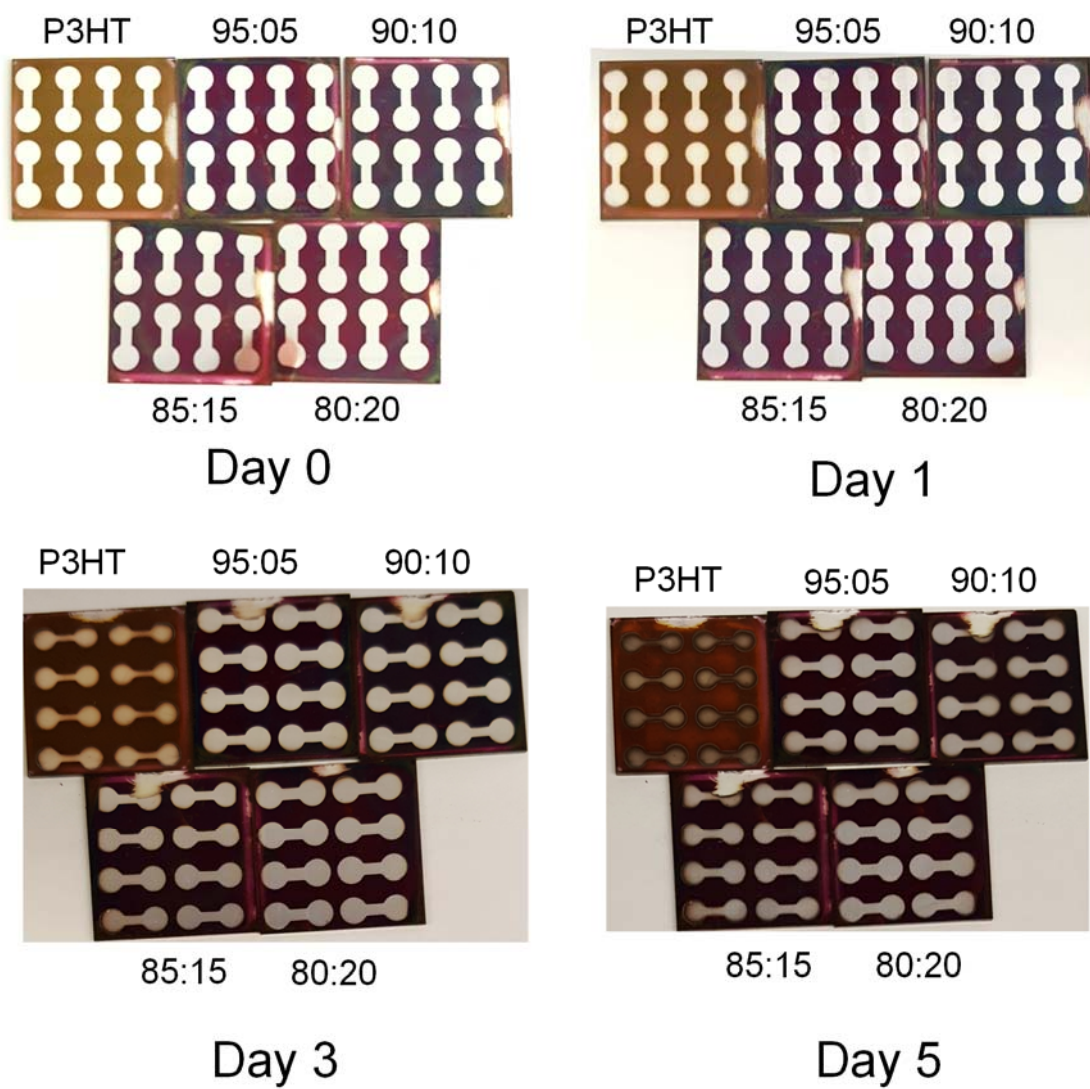

**Fig. S10.** Photographs of the ITO/ZnO/CH<sub>3</sub>NH<sub>3</sub>PbI<sub>3</sub>/HTLs/Ag devices after aging in air; the corrosion of the silver electrode in the P3HT control samples is easily apparent.

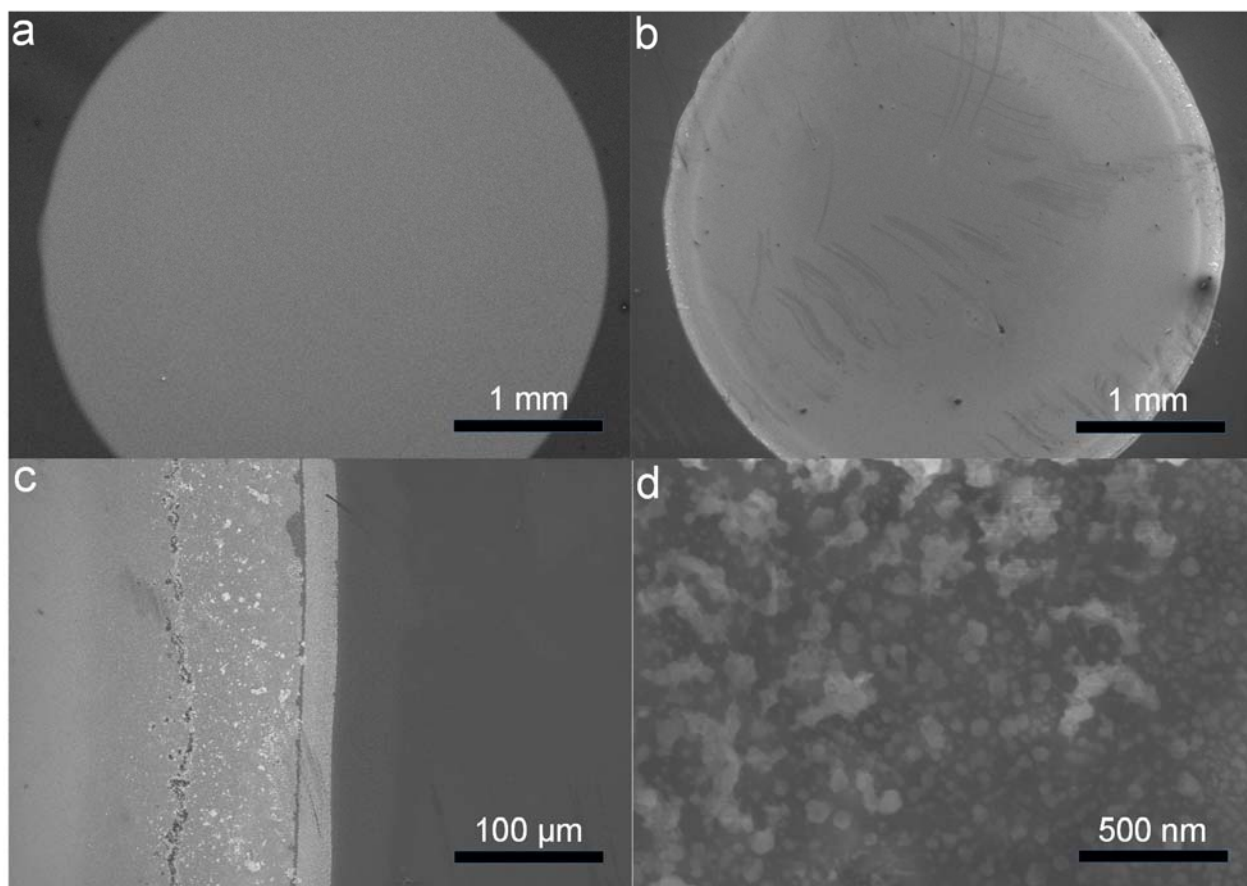

**Fig. S11.** SEM images of the silver electrode of a P3HT control device: (a) as prepared, and (b-d) after 6 days of aging in air; (c) and (d) are higher magnification images of the electrode edge.

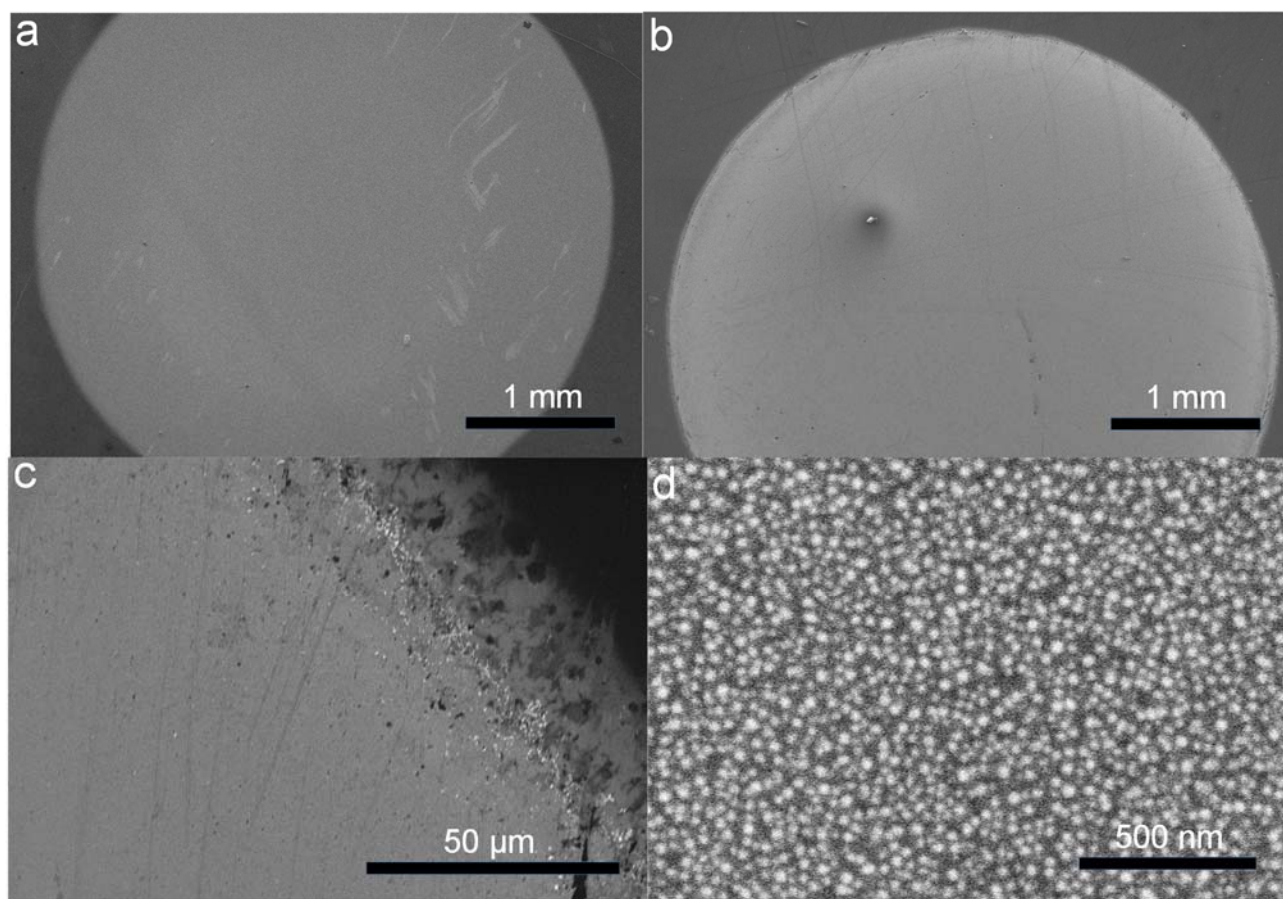

**Fig. S12.** SEM images of the silver electrode of a 95:5 PMMA/P3HT device: (a) as prepared, (b-d) after 6 days of aging in air; (c) and (d) are higher magnification images of the electrode edge.

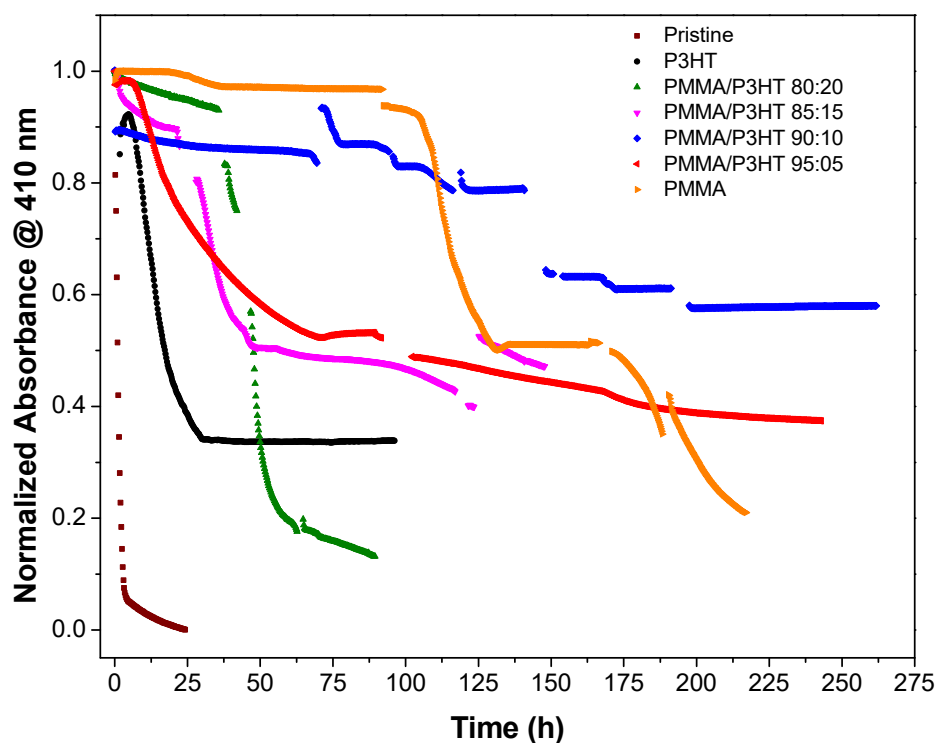

**Fig. S13.** Normalized absorbance at 410 nm as a function of time for polymer-coated perovskite films exposed to a  $99 \pm 1\%$  RH environment.

## References

1. W. J. E. Beek, M. M. Wienk, M. Kemerink, X. Yang and R. A. J. Janssen, *J. Phys. Chem. B*, 2005, **109**, 9505-9516.
2. D. Liu and T. L. Kelly, *Nat. Photonics*, 2014, **8**, 133-138.
3. M. M. Lee, J. Teuscher, T. Miyasaka, T. N. Murakami and H. J. Snaith, *Science*, 2012, **338**, 643-647.
4. H.-S. Kim, C.-R. Lee, J.-H. Im, K.-B. Lee, T. Moehl, A. Marchioro, S.-J. Moon, R. Humphry-Baker, J.-H. Yum, J. E. Moser, M. Grätzel and N.-G. Park, *Sci. Rep.*, 2012, **2**, 591.
